# Supplementary material for: Targeting USP7 Identifies a Metastasis-Competent State within Bone Marrow–Resident Melanoma CTCs
Source: Oxford University Press journal article supplement (doi:10.1158/0008-5472.can-18-0644), 2018-07-19
Supplement: 00085472can180644-sup-197791_2_supp_4886277_pbpk9j.pdf [file 00085472can180644-sup-197791_2_supp_4886277_pbpk9j.pdf]

# **Targeting USP7 identifies a metastasis-competent state within bone marrow-resident melanoma circulating tumor cells**

Monika Vishnoi<sup>1</sup>, Debasish Boral<sup>1</sup>, Haowen Liu<sup>1</sup>, Marc L. Sprouse<sup>1</sup>, Wei Yin<sup>1</sup>, Debalina Goswami-Sewell<sup>1</sup>,  
Michael T. Tetzlaff<sup>2</sup>, Michael A. Davies<sup>2</sup>, Isabella C. Glitza Oliva<sup>2</sup>, and Dario Marchetti<sup>1</sup>

<sup>1</sup>Biomarker Research Program Center, Houston Methodist Research Institute, Houston, TX

<sup>2</sup>Department of Melanoma Medical Oncology, The University of Texas MD Anderson Cancer Center, Houston, TX

**Running Title:** Molecular insights of BM-resident melanoma cells

## Supplementary Information



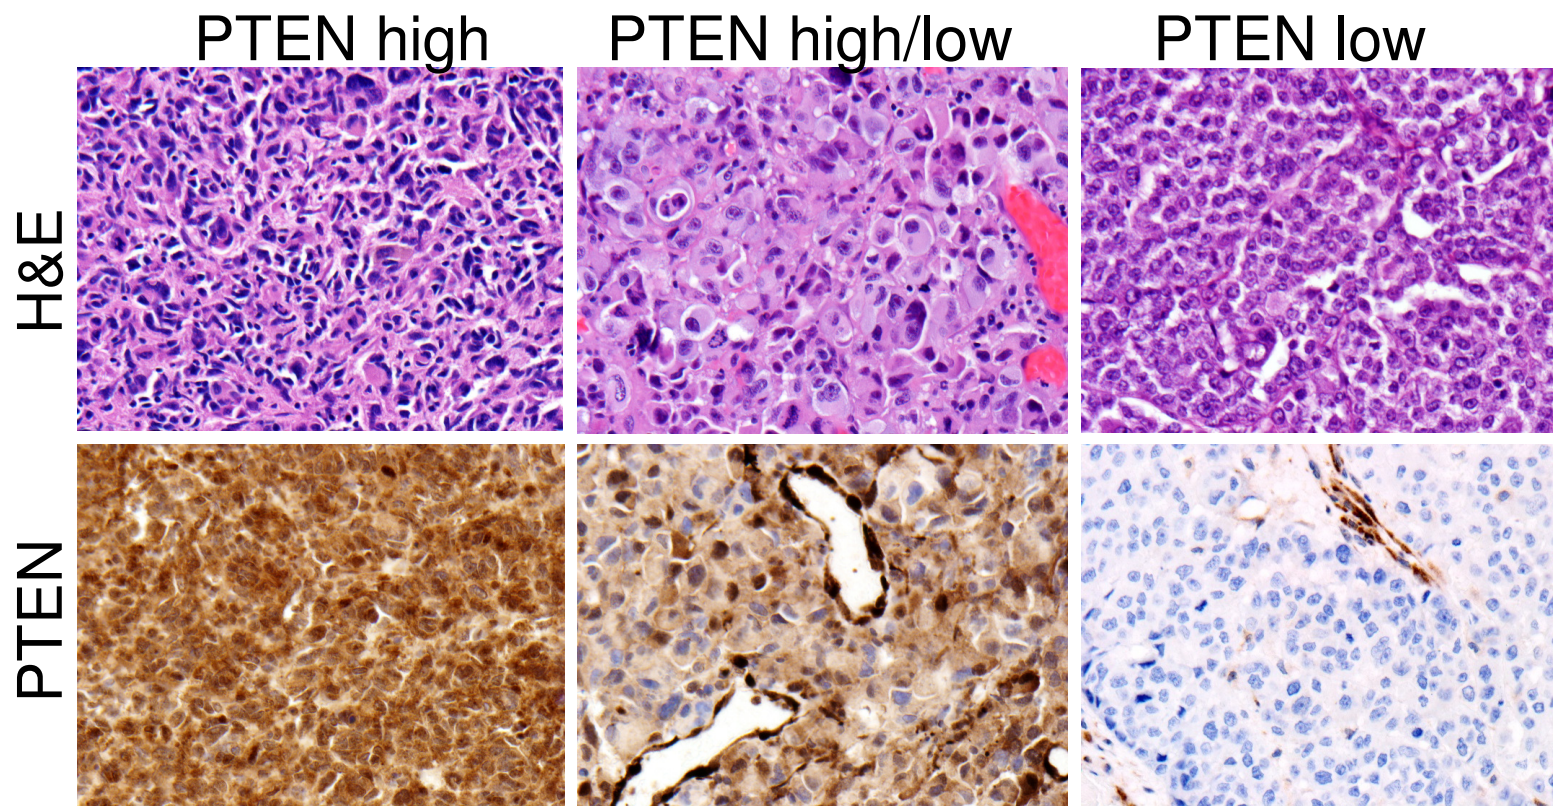

**Supplementary figure S1:** Melanoma patient-derived metastatic tissue (lung and liver) showing representative images of PTEN staining (200x resolution).

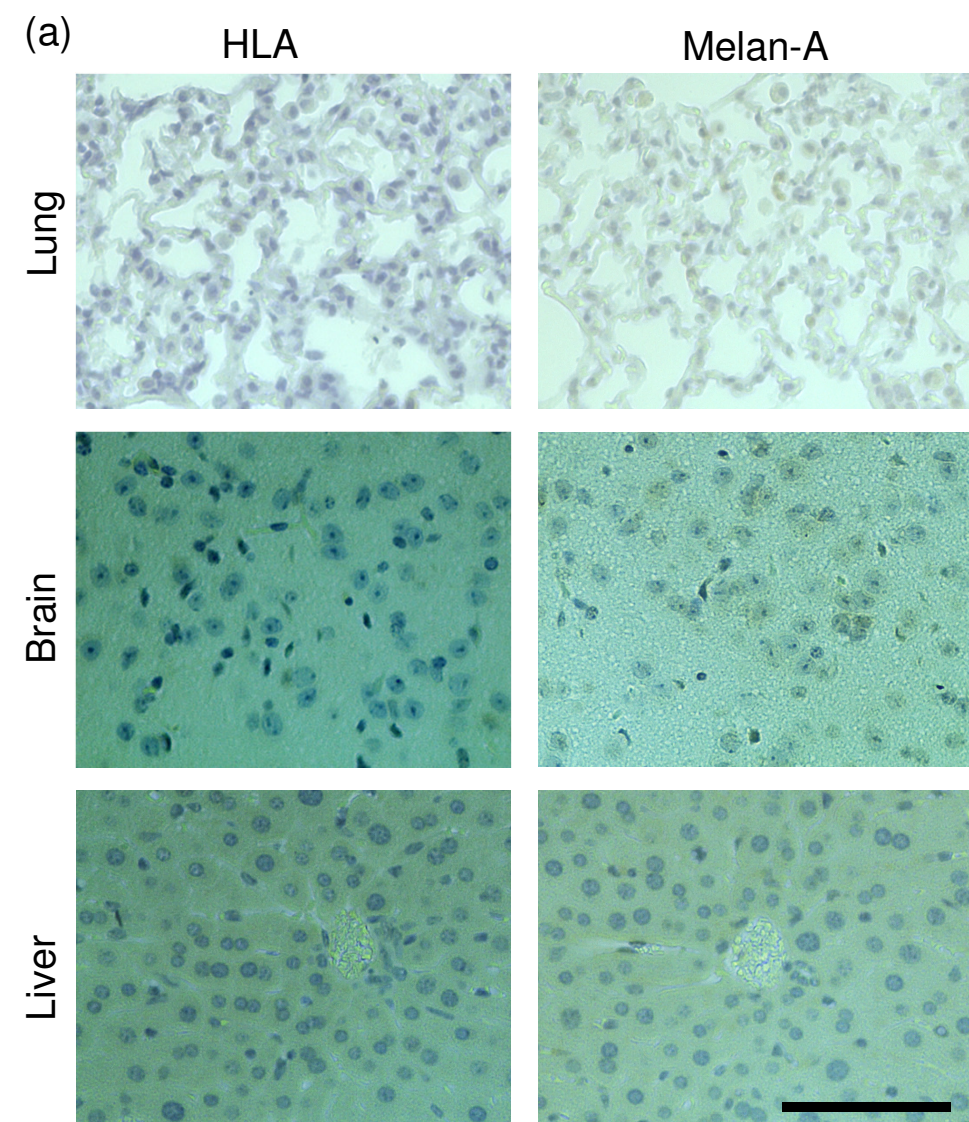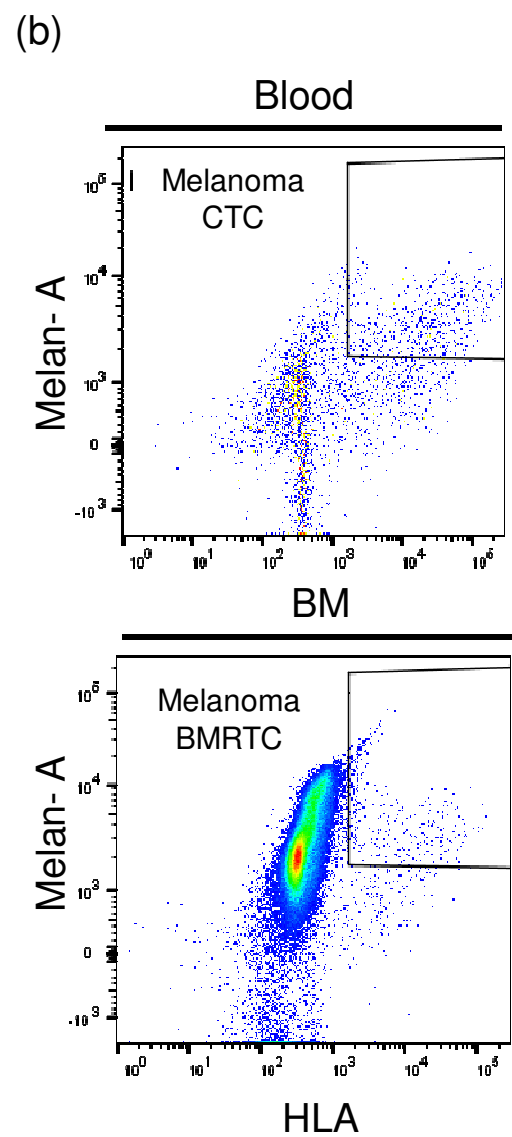

**Supplementary figure S2:**  
**Evaluation of HLA+/Melan-A+ population**  
**in different organs of CDX mice,**  
**ethanized after 3 months of Lin-**  
**neg/CTCs enriched population.** (a)  
 Immunohistochemistry analysis of HLA+ and  
 Melan-A staining showing absence of micro-  
 metastasis in lung, brain and liver region  
 (scale bar=100  $\mu$ M) (b) Flow-sorting  
 analyses showing presence of HLA+/Melan-  
 A+ population in blood and BM.







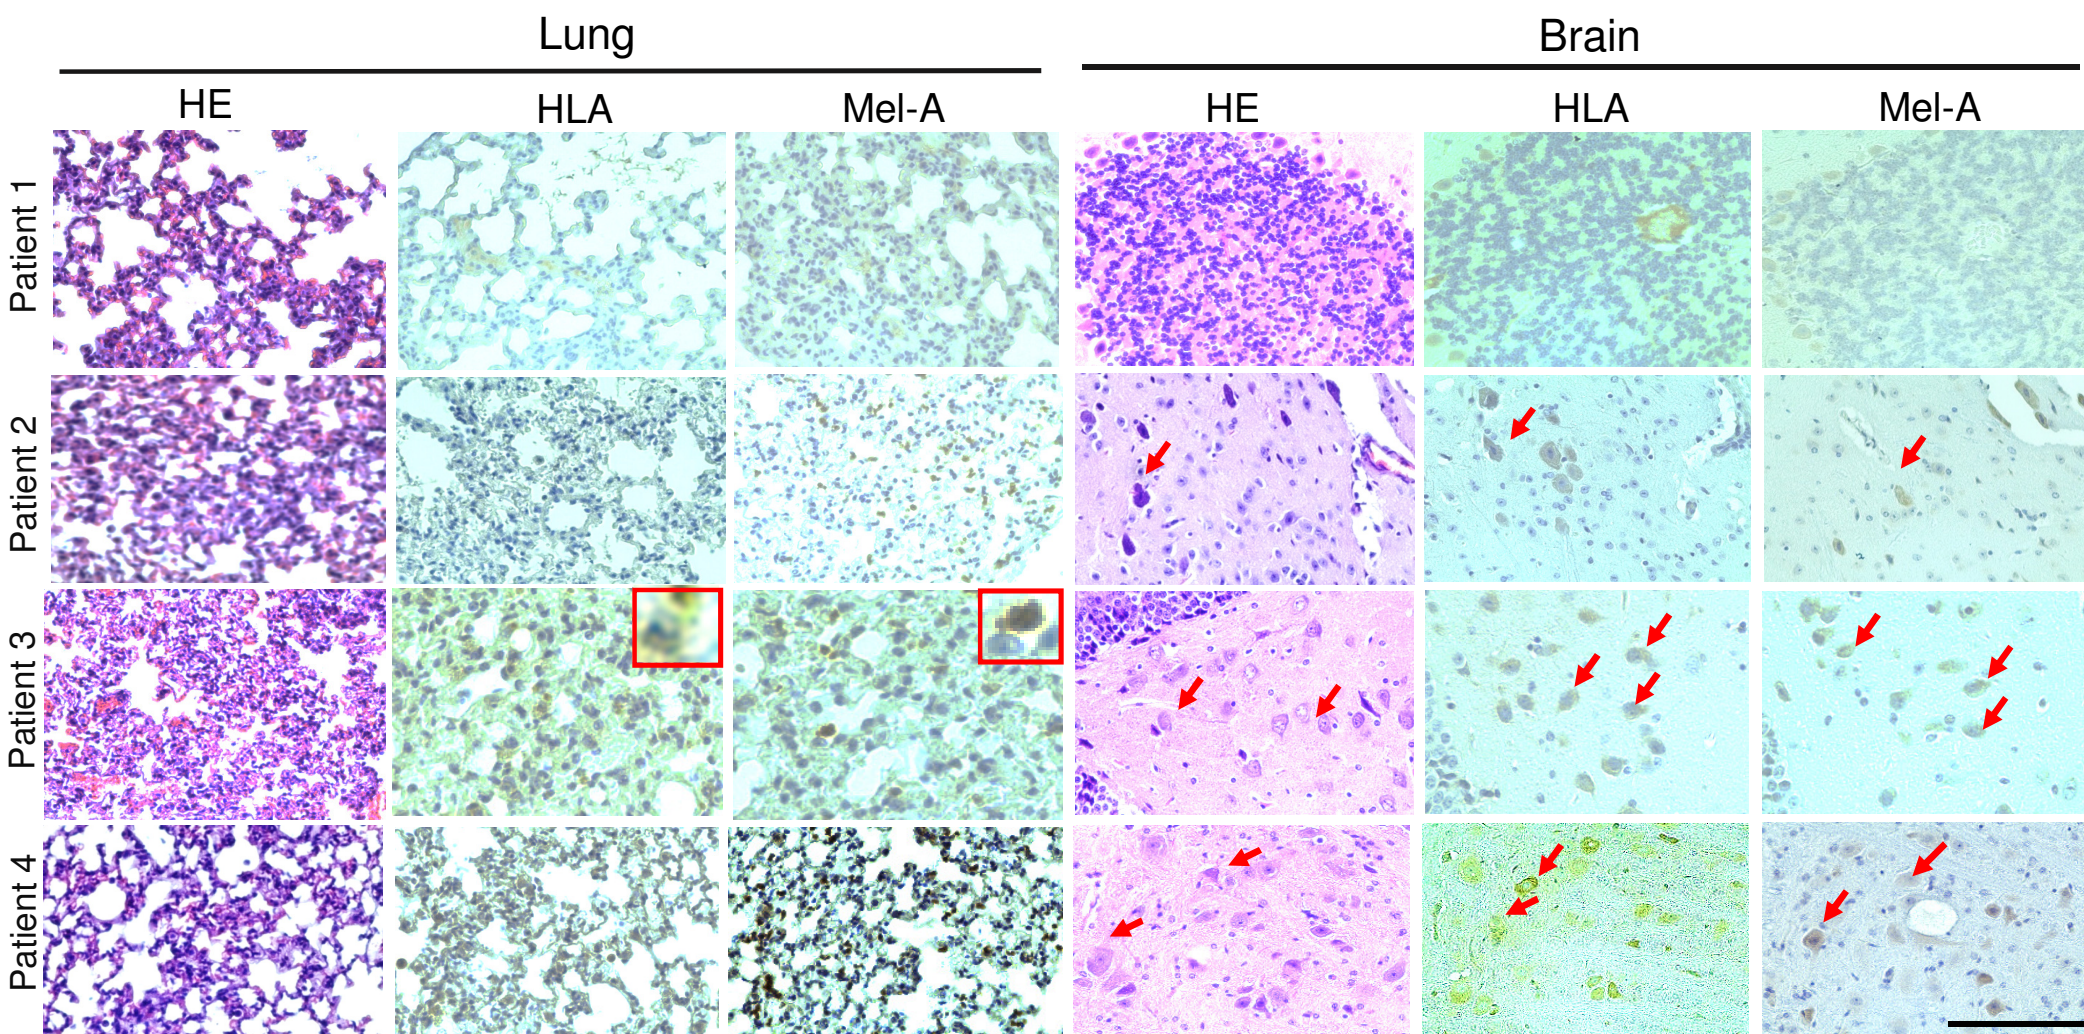

**Supplementary figure S4a: Histopathological evaluation of murine xenograft tissues following CTC injection.** Immunohistochemical analyses were performed to validate expression of Human-HLA-ABC and Melan-A markers in harvested xenograft lung and brain tissues. Inset and red arrows indicate representative examples of residual positive cells of respective marker staining. Brightness and contrast were adjusted for publication purposes. Scale bar=100  $\mu$ M.



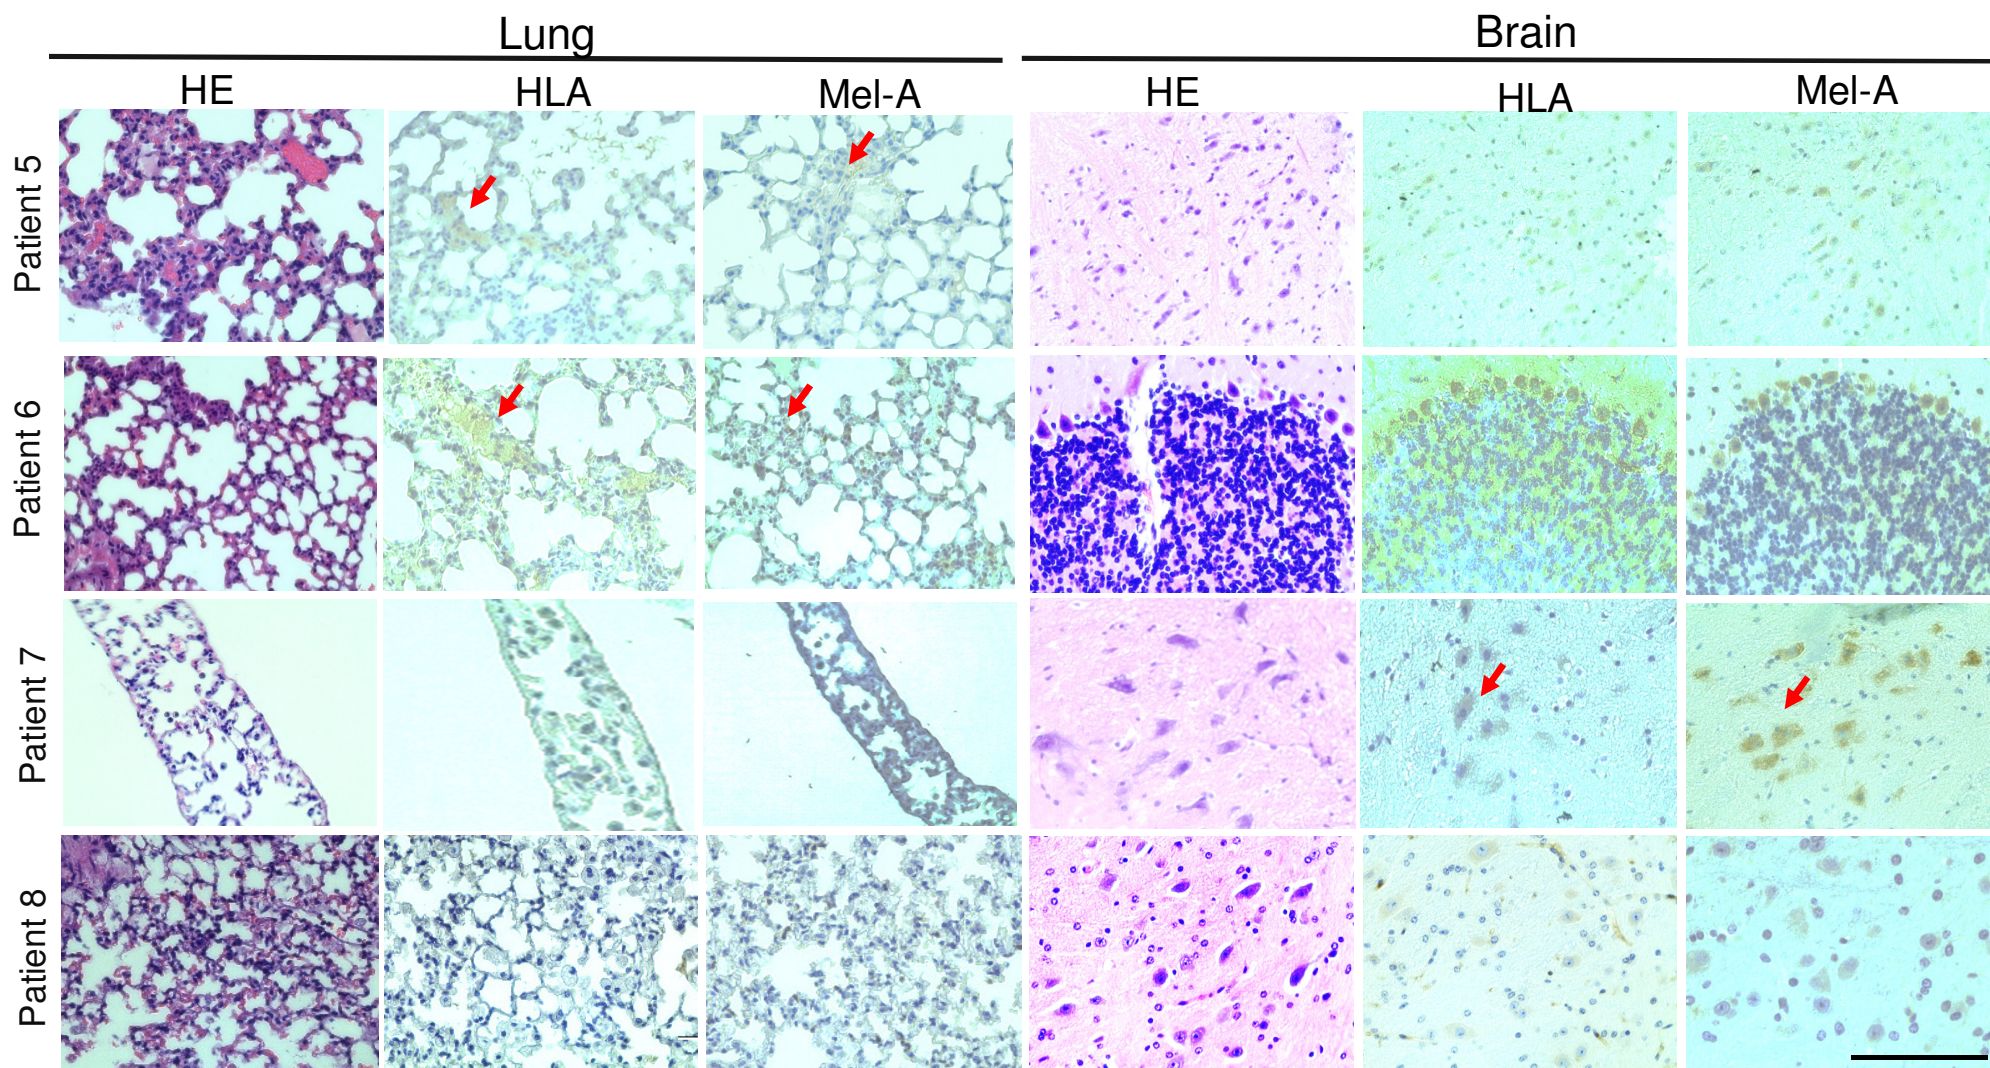

**Supplementary figure S4b: Histopathological evaluation of murine xenograft tissues following CTC injection.** Immunohistochemical analyses were performed to validate expression of Human-HLA-ABC and Melan-A markers in harvested xenograft lung and brain tissues. Arrows indicate representative examples of residual positive cells. Brightness and contrast were adjusted for publication purposes. Scale bar=100  $\mu$ M.

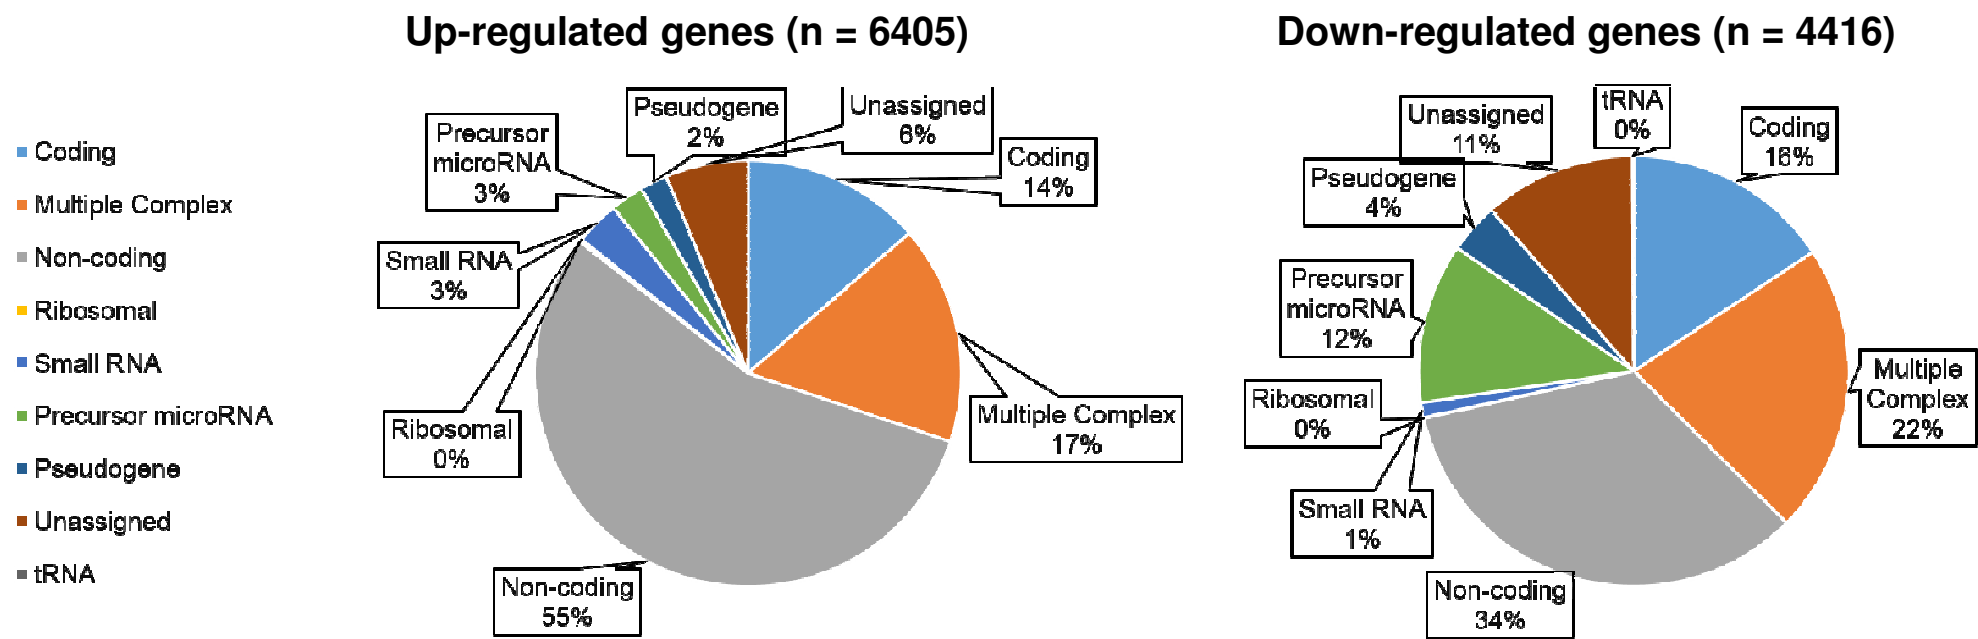

**Supplementary figure S5: Transcriptome profiling of *ex vivo* vs *de novo* CTCs (Lin-neg/CTCs-enriched population) from paired patient samples (n=4).** Differential gene expression analysis (Patients #2, 3, 4 and 7) showing altered up-regulated and down-regulated genes (FC=2.5; *P*-value=0.05).



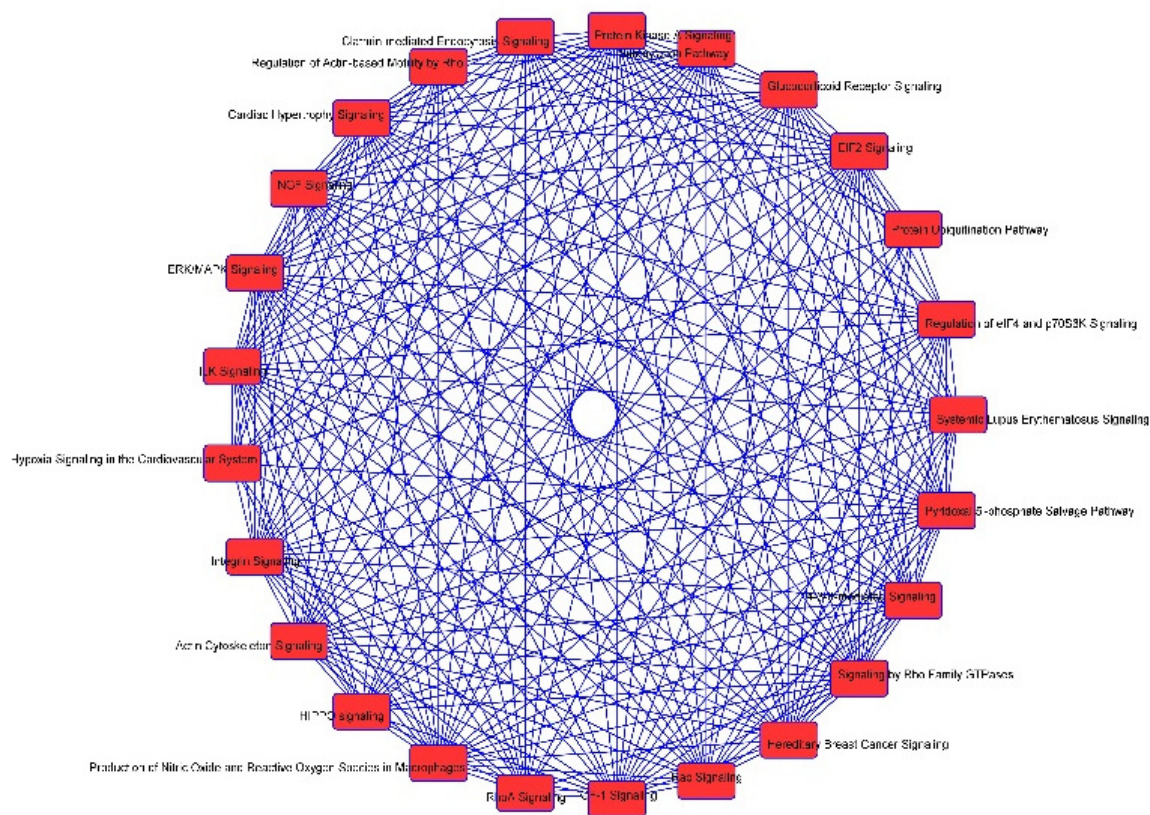

**Supplementary figure S6: Transcriptome profiling of CDX BMRTCs vs. CTCs.** Overlapping pathways showing altered canonical pathways in *ex-vivo* BMRTCs vs. CTCs population through Ingenuity pathway analysis.

## Supplementary figure S7



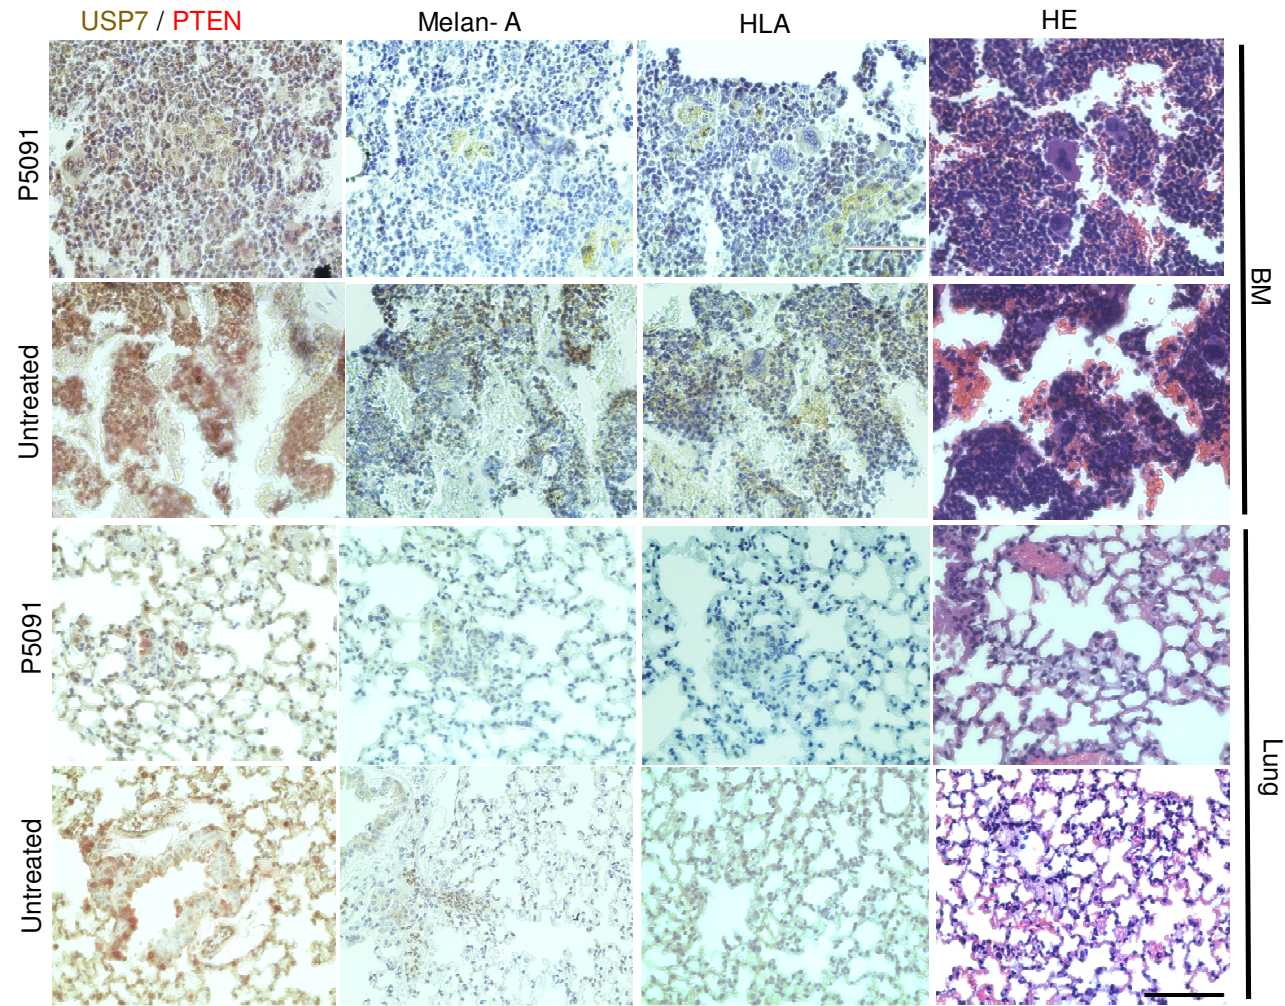

**Extended figure S7a: Effect of USP7 inhibitors, P5091 on metastatic potency of BMRTCs population in CDXs.** Histopathological evaluation of HLA, Melan-A, HE stain with co-localization USP7 and PTEN in similar BM and lung region derived from USP7 inhibitor treated vs. untreated from CDXs (Patient #11). Scale bar=100 μm.



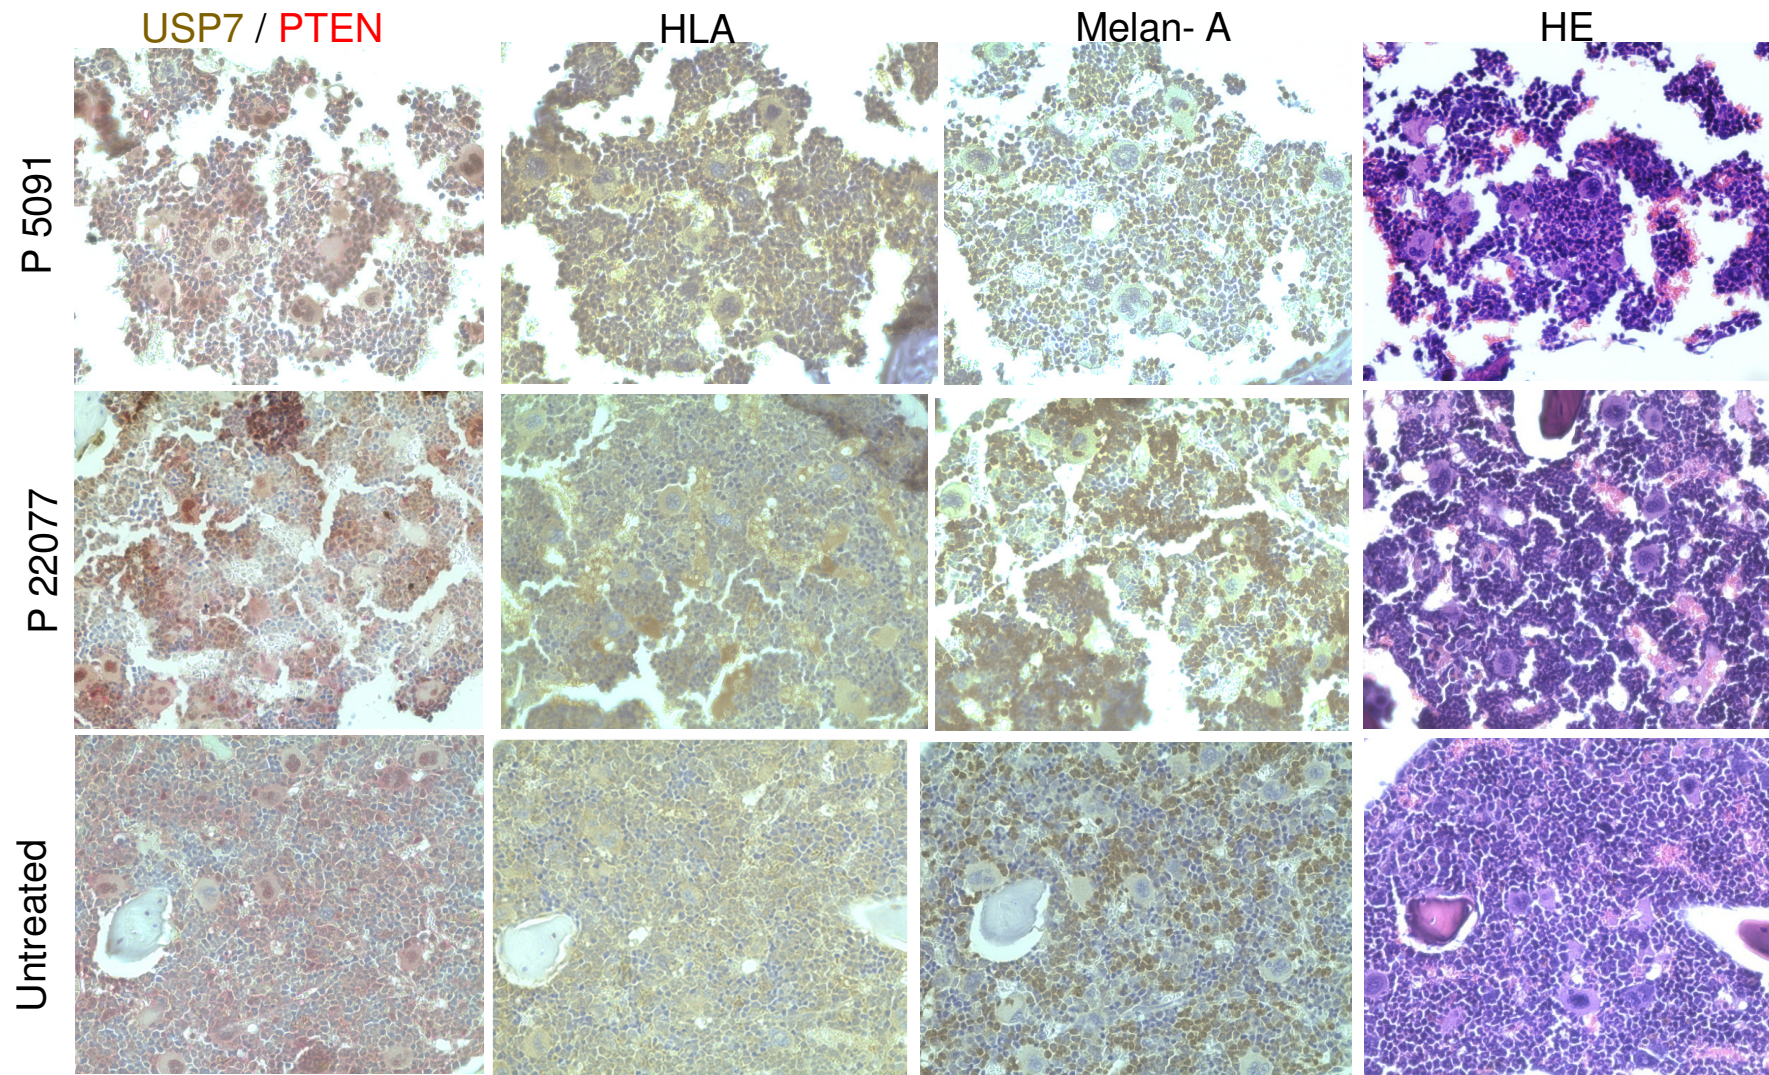

**Extended figure S7b (i): Effect of USP7 inhibitors, P5091 and P22077 on metastatic potency of BMRTCs population in CDXs.** Histopathological evaluation of HLA, Mel-A, HE stain with co-localization USP7 and PTEN in similar BM region derived from USP7 inhibitor treated vs. untreated from CDXs (Patient #12). Scale bar=100  $\mu$ m.



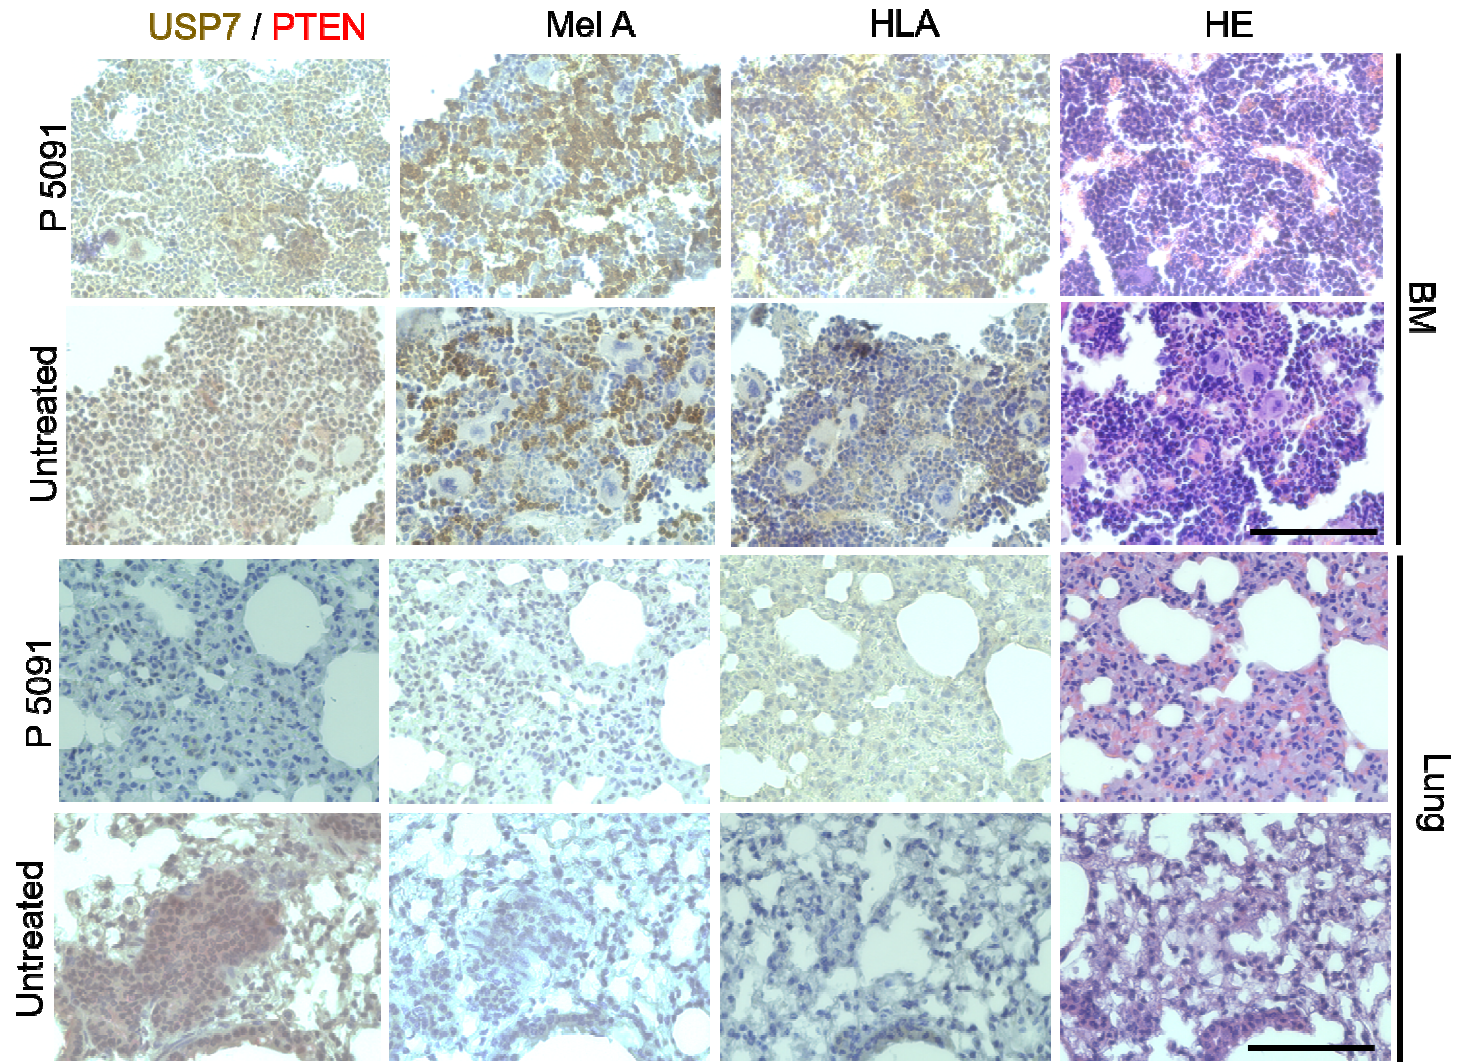

**Extended figure S7b (ii): Effect of USP7 inhibitors, P5091 on metastatic potency of BMRTC's population in CDXs.** Histopathological evaluation of HLA, Mel-A, HE stain with co-localization USP7 and PTEN in similar BM and lung region derived from USP7 inhibitor treated vs. untreated from CDXs (Patient #12). Scale bar=100  $\mu$ m.



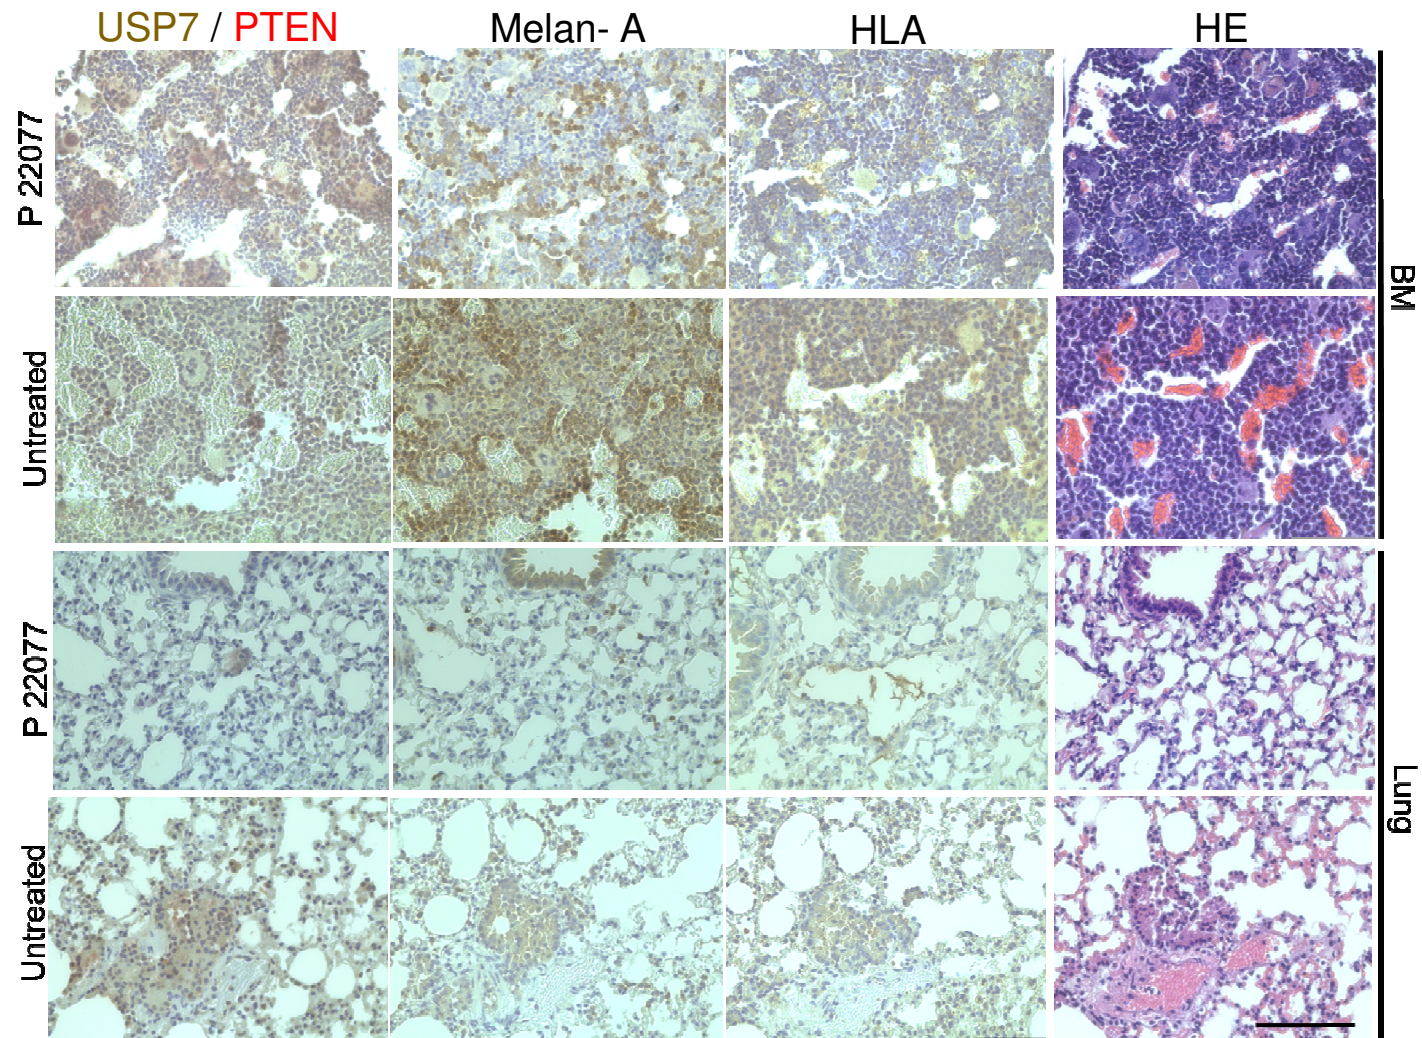

**Extended figure S7c: Effect of USP7 inhibitors, P22077 on metastatic potency of BMRTCs population in CDXs.** Histopathological evaluation of HLA, Mel-A, HE stain with co-localization USP7 and PTEN in similar BM and lung region derived from USP7 inhibitor treated vs. untreated from CDXs (Patient #13). Scale bar=100  $\mu$ m.



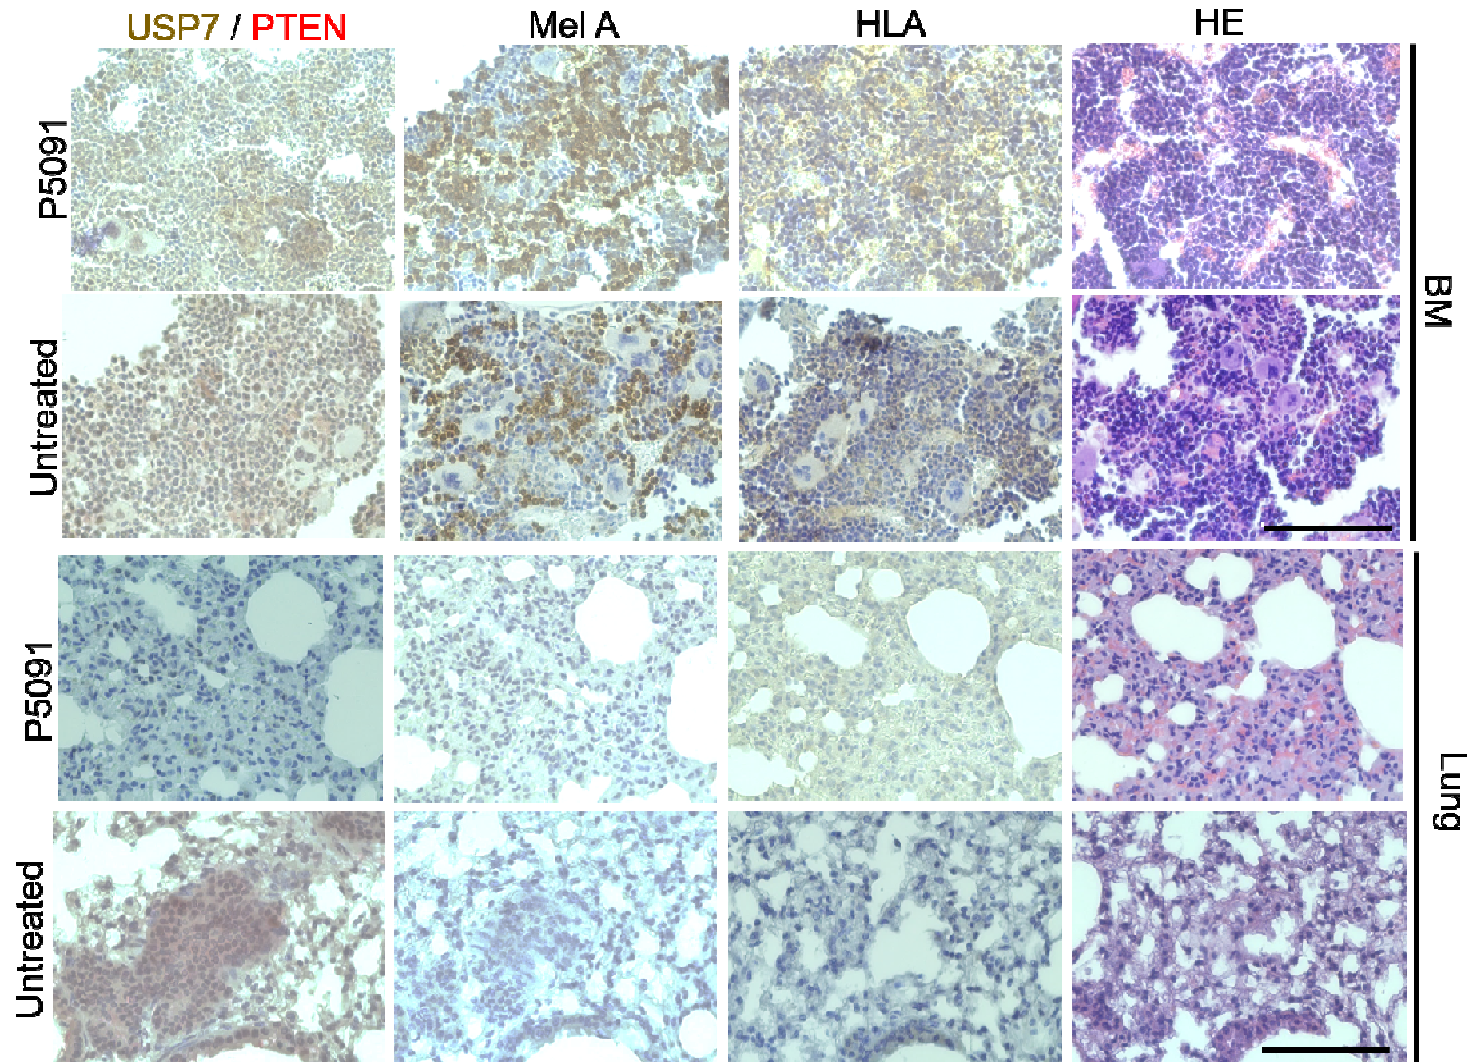

**Extended figure S7d: Effect of USP7 inhibitors, P5091 on metastatic potency of of BMRTCs population in CDXs.** Histopathological evaluation of HLA, Melan-A, HE stain with co-localization USP7 and PTEN in similar BM region derived from USP7 inhibitor treated vs. untreated from CDXs (Patient #14). Scale bar=100  $\mu$ m.

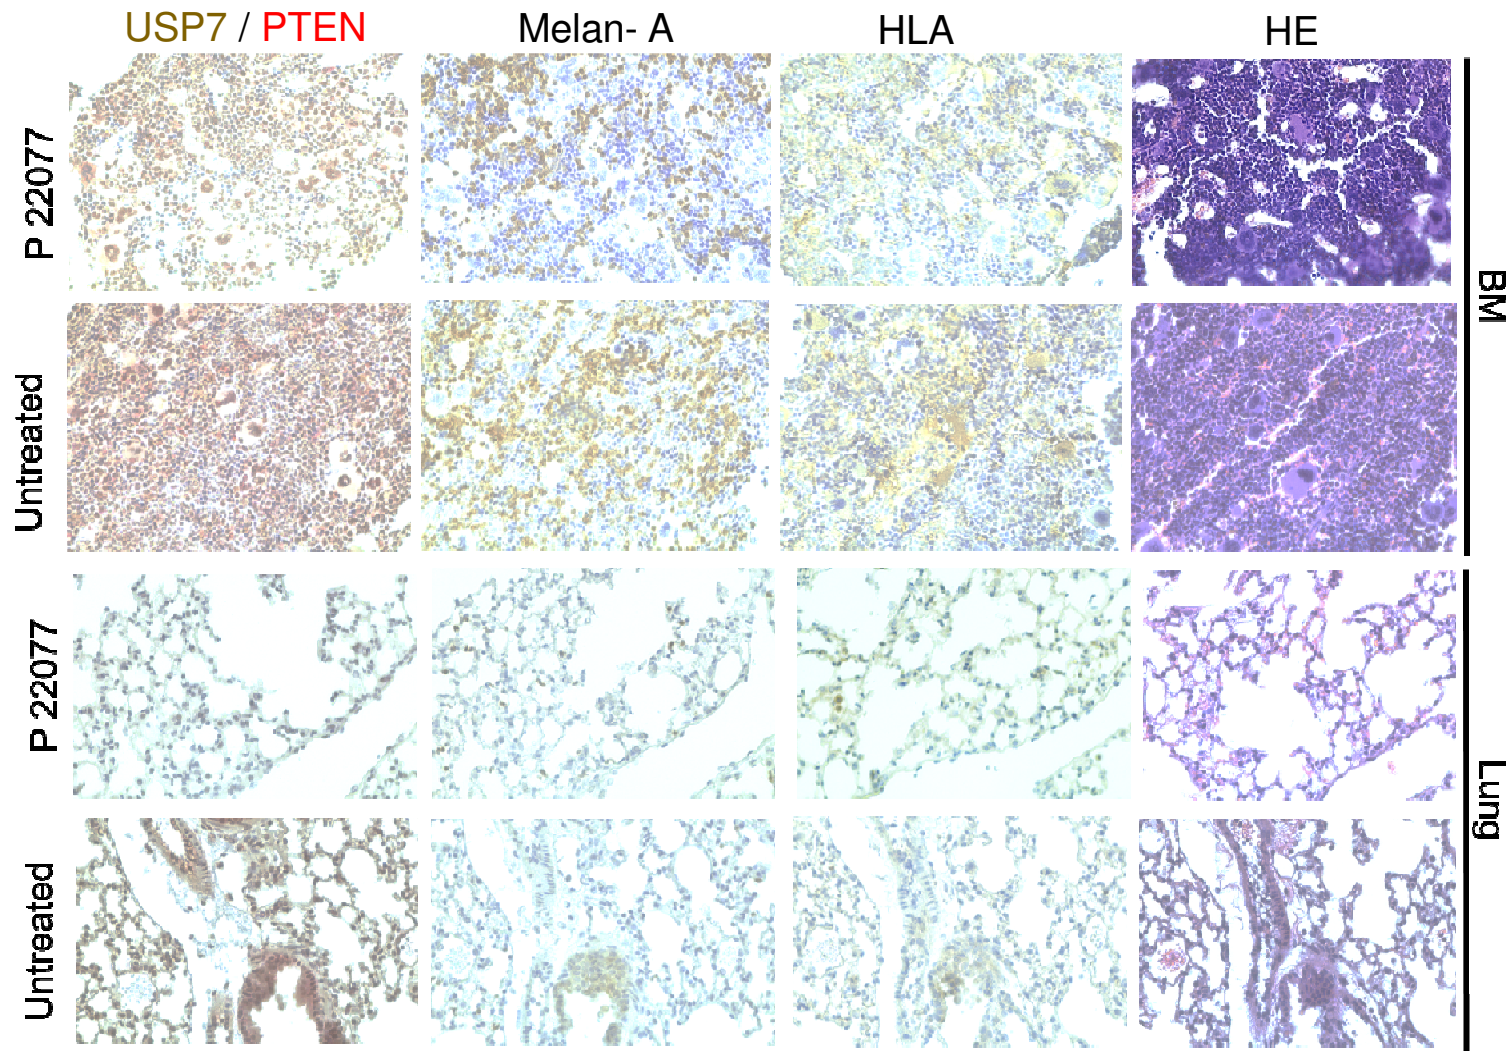

**Extended figure S7e: Effect of USP7 inhibitors, P22077 on metastatic potency of BMRTCs population in CDXs.** Histopathological evaluation of HLA, Mel-A, HE stain with co-localization USP7 and PTEN in similar BM and lung region derived from USP7 inhibitor treated vs. untreated from CDXs (Patient #15). Scale bar=100  $\mu$ m.



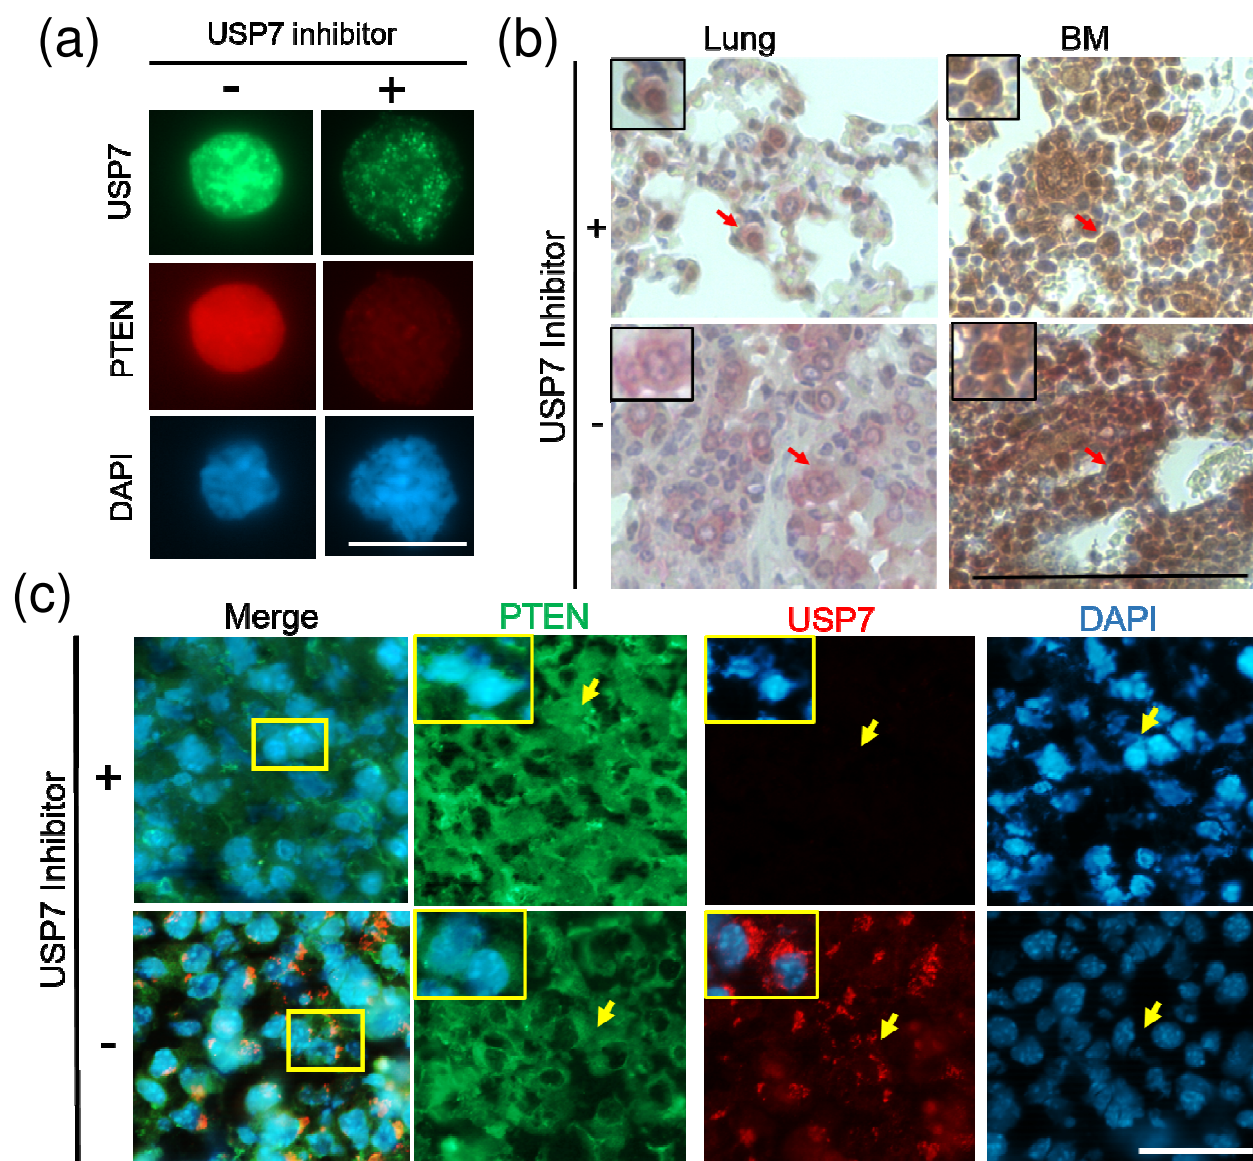

**Supplementary figure S8 : Effect of USP7 inhibitors on localization of USP7 and PTEN expression** (a) immunofluorescent analyses on flow-sorted HLA+ and Melan-A+ BMRTCs population derived from CDXs mice (scale bar=10  $\mu$ M) (b) immunohistochemistry in lung and BM tissues (scale bar=100  $\mu$ M) derived from CDXs mice. (c) immunofluorescent analyses in lung region of syngeneic mice (scale bar=50  $\mu$ M); insets show bigger magnification of regions indicated by arrows.

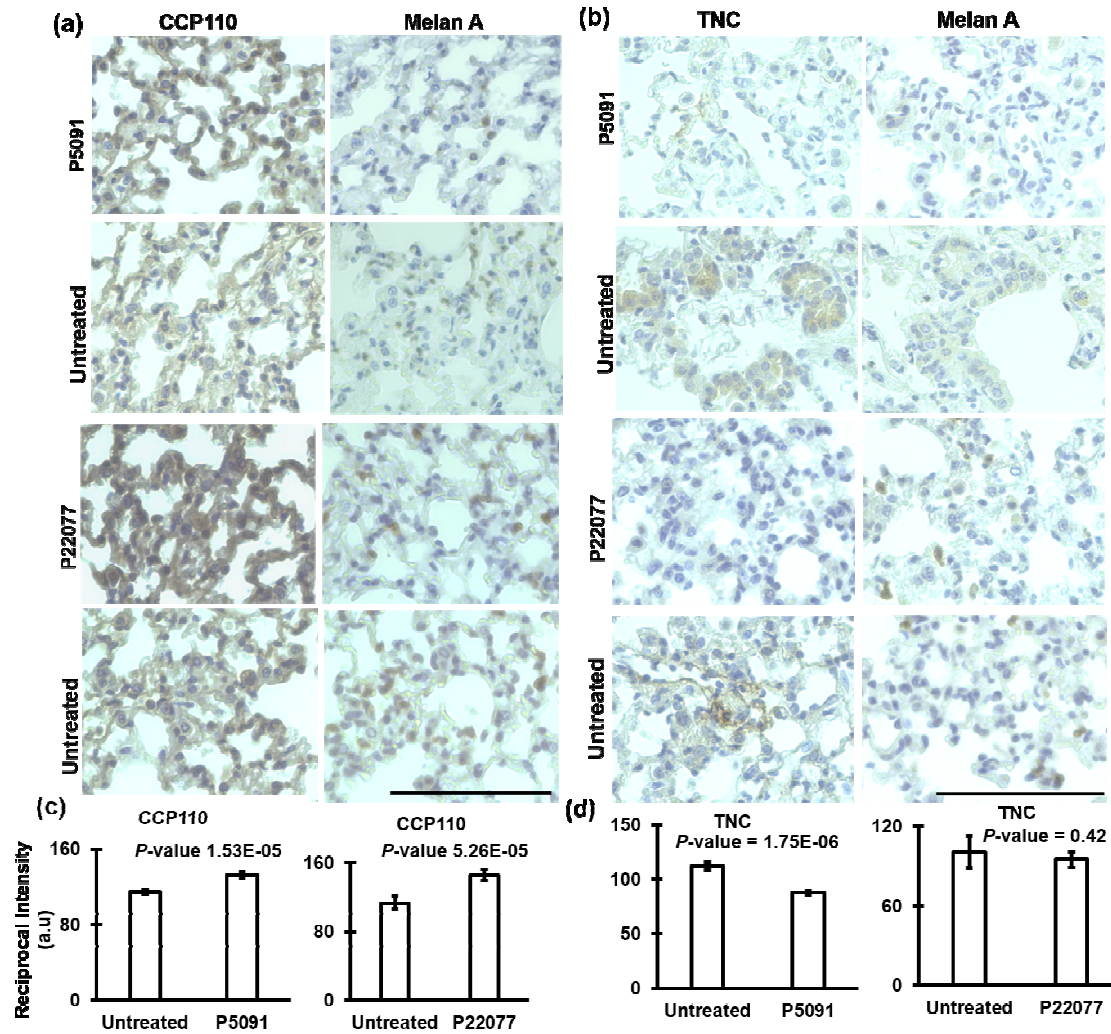

**Supplementary figure S9: Effect of USP7 inhibitors (P5091 and P22077) in CDXS.** Histopathological evaluation of CCP110 (Patient #11 and 16). TNC (Patients #11 and 15) and respective Melan-A staining in lung region derived from USP7 inhibitor treated vs untreated from CDXS. Scale bar=100  $\mu$ m. Representative images are shown. Student t- test *paired 2, type 2*, was performed to calculate respective *P*-values.



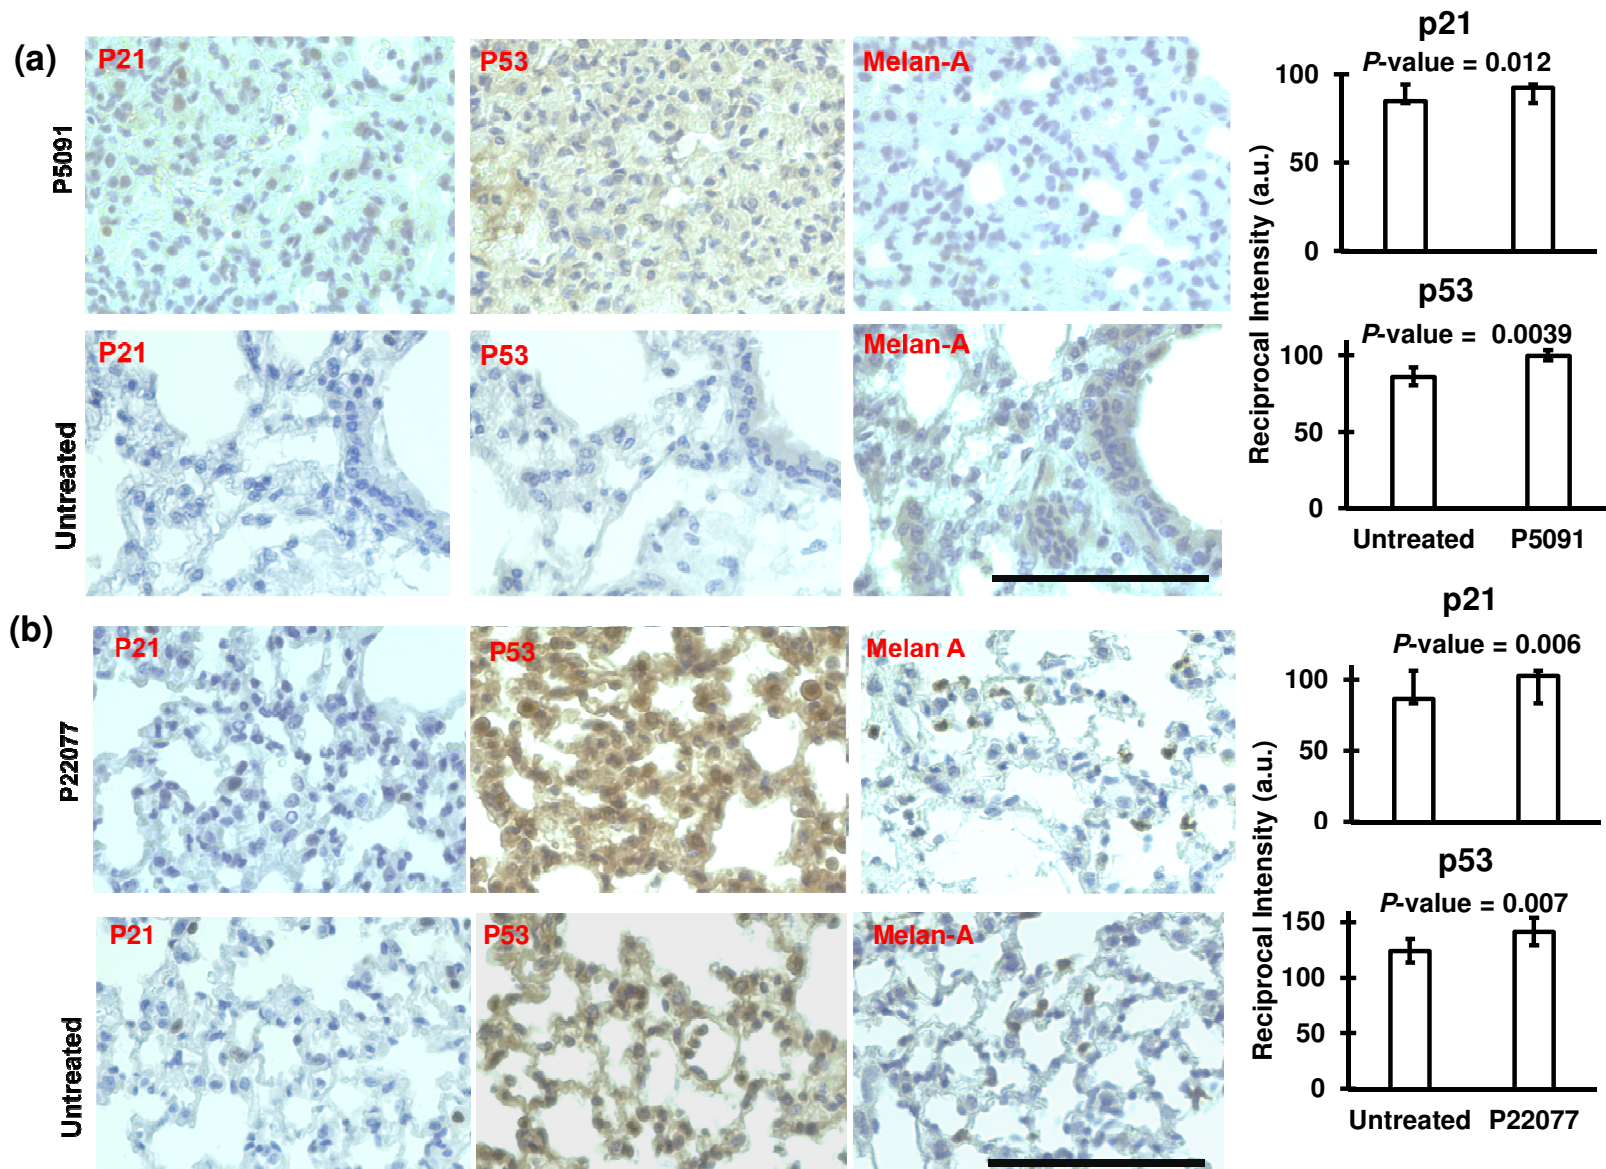

**Supplementary figure S10 a & b: Effect of USP7 inhibitors [P5091 (a) and P22077 (b)] on P21/P53/Melan-A markers expression.** Histopathological evaluation and signal intensity quantification of p21, p53 and Melan-A staining of same lung regions in USP7 inhibitor treated vs untreated from CDxs (Patient #13 and 15). Scale bar=100  $\mu$ m. Representative images are shown. Student *t*-test *paired 2, type 2*, were performed to calculate respective *P*-value.



(c)

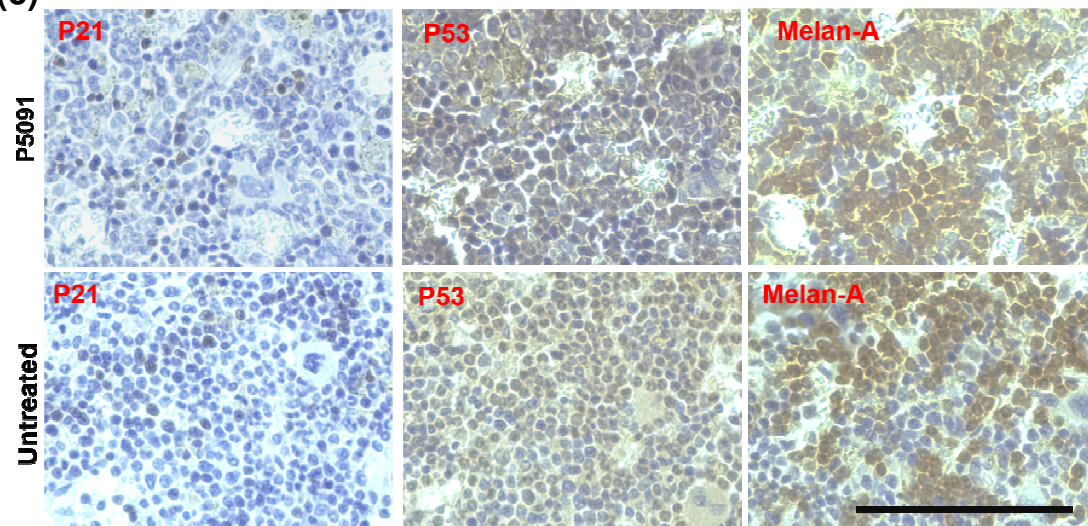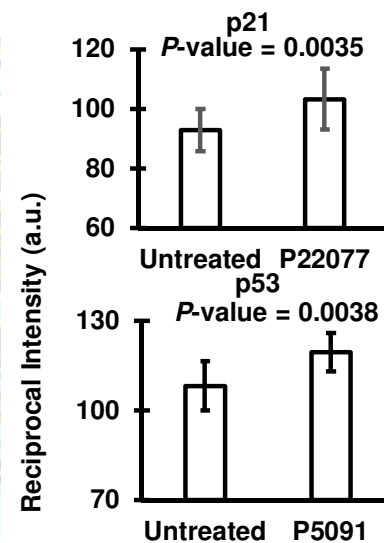

(d)

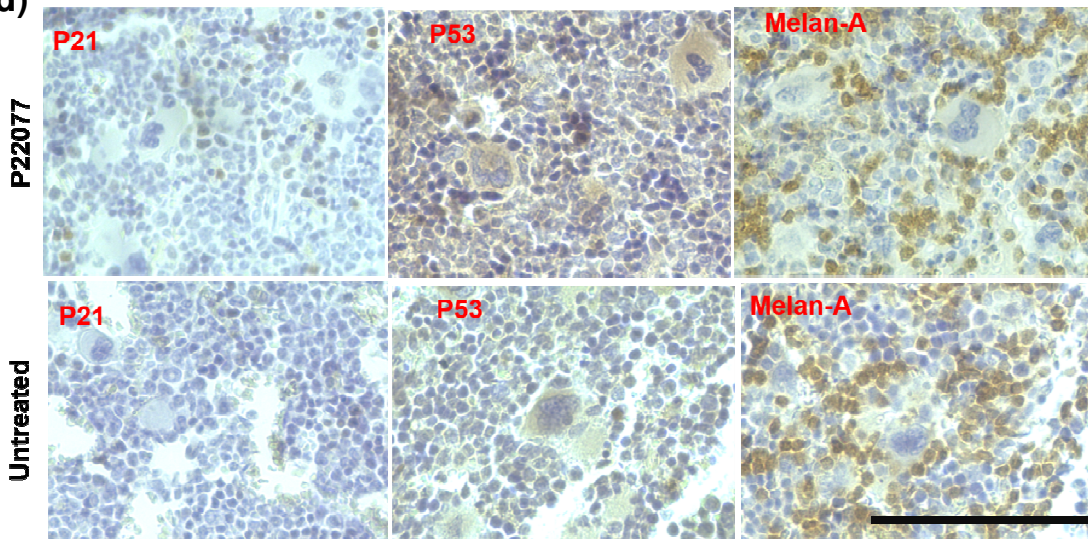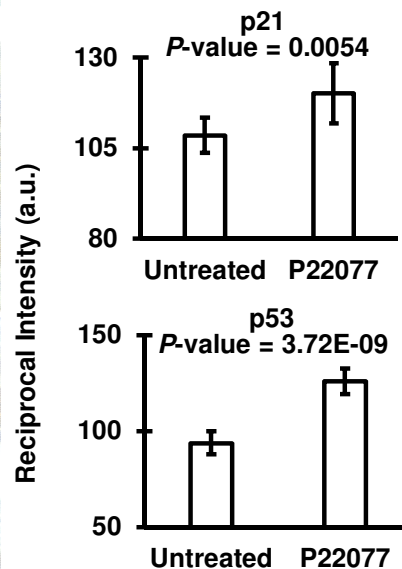

Supplementary figure S10 c & d: Effect of USP7 inhibitors [P5091 (c) and P22077 (d)] on P21/P53/Melan-A markers expression.

Histopathological evaluation and signal intensity quantification of p21, p53 and Melan-A staining of same BM regions in USP7 inhibitor treated vs untreated from CDxs (Patient# 13 and 15). Scale bar=100  $\mu$ m. Student *t*-test *paired 2, type 2*, were performed to calculate respective *P*-values. Representative images are shown.

**Supplementary table S1: Clinico-pathological parameters of advanced melanoma patients used for this study.** Clinical parameters includes gender, age, site/type of primary tumor, tumor stage, mutational status, metastatic site with previous and current therapy of melanoma patients.

| Patient ID | Gender | Age | Type of primary   | Stage  | Mutation Status                                                                                                                                                                        | PTEN H- score | Site of disease at any time                    | Previous Therapies                                                    | Therapy at time of sample collection  |
|------------|--------|-----|-------------------|--------|----------------------------------------------------------------------------------------------------------------------------------------------------------------------------------------|---------------|------------------------------------------------|-----------------------------------------------------------------------|---------------------------------------|
| 1          | Male   | 39  | Cutaneous         | IV M1c | BRAF V600E                                                                                                                                                                             | NA            | Brain (Leptomeninges only)                     | Dabrafenib, trametinib                                                | Dabrafenib, trametinib                |
| 2          | Male   | 49  | unknown           | IV M1c | BRAF V600K                                                                                                                                                                             | 75            | Brain, lung, lymphnode, visceral, adrenal      | Nivolumab, ipilimumab,dabrafenib, trametinib, pembrolizumab, abraxane | Pembrolizumab, abraxane               |
| 3          | Male   | 72  | Cutaneous         | IV M1c | NRAS Q61R                                                                                                                                                                              | 72            | Brain, soft tissue, subcutaneous, lymphnode    | 1038277                                                               | None                                  |
| 4          | Male   | 74  | Cutaneous         | IV M1c | BCL9 G1373E, CDKN2A P114L, EGFR P733S, ERBB4 G286K, KNSTRN P28S, MYO18A V1342I, NF1 G1219R, R2450 (Nonsense), NRAS T50I, TET2 E350K, TP53 Q331 (Nonsense), Q317 (Nonsense), TSC1 P396S | 60            | Brain                                          | None                                                                  | None                                  |
| 5          | Female | 58  | Acral lentiginous | IV M1c | BRAF V600E                                                                                                                                                                             | 250           | Bone                                           | None                                                                  | None                                  |
| 6          | Male   | 56  | unknown           | IV M1a | BRAF V600E, Tp53                                                                                                                                                                       | 25            | Lymphnode                                      | Ipilimumab                                                            | Pembrolizumab                         |
| 7          | Male   | 27  | Cutaneous         | IIIB   | NRAS Q61k, CDKN2A E61                                                                                                                                                                  | NA            | Lymphnode                                      | None                                                                  | None                                  |
| 8          | Male   | 69  | unknown           | IV M1c | BRAF negative                                                                                                                                                                          | NA            | Liver, lung                                    | None                                                                  | Ipilimumab, nivolumab                 |
| 9          | Female | 65  | Cutaneous         | IV M1b | BRAF V600E, ERBB2 V773M                                                                                                                                                                | NA            | Lymphnode, (Leptomeninges)                     | Nivolumab                                                             | Nivolumab                             |
| 10         | Female | 67  | Cutaneous         | IV M1c | BRAF V600E, CDKN2A R124 (Frameshift)18, ATM V2705I                                                                                                                                     | NA            | Brain, soft tissue, visceral                   | None                                                                  | Dabrafenib, trametinib                |
| 11         | Male   | 75  | Cutaneous         | IV M1c | PDGFRA D846N                                                                                                                                                                           | 70            | Brain, lung                                    | None                                                                  | None                                  |
| 12         | Male   | 67  | Cutaneous         | IV M1b | Unknown                                                                                                                                                                                | 280           | Skin, lung                                     | None                                                                  | None                                  |
| 13         | Female | 37  | Cutaneous         | IV M1c | BRAF V600E                                                                                                                                                                             | 0             | Brain, lungs, liver, bone, spleen, soft tissue | Dabrafenib,trametinib, pembrolizumab                                  | Pembrolizumab, dabrafenib, trametinib |
| 14         | Female | 58  | Cutaneous         | IV M1c | BRAF V600E                                                                                                                                                                             | 280           | Brain, skin, lymphnode, lung                   | Ipilimumab, dabrafenib, trametinib                                    | Pembrolizumab                         |
| 15         | Male   | 52  | Cutaneous         | IIIB   | Unknown                                                                                                                                                                                | 300           | lymphnode                                      | None                                                                  | None                                  |
| 16         | Female | 55  | unknown           | IV M1c | CDKN2A R80 (Nonsense), CDKN2A A68 frameshift78,FGFR3 G784E                                                                                                                             | NA            | Brain                                          | None                                                                  | Ipilimumab, nivolumab                 |

**Supplementary table S2: Downregulated proliferative markers analyzed by microarray in patient-derived Lin-neg vs. healthy donor PBMCs population**

| Gene Symbol | Fold Change | <i>P</i> -value |
|-------------|-------------|-----------------|
| PCNA        | -24         | 9.01E-07        |
| MKI67       | -3.02       | 0.0075          |
| RBL2        | -379.96     | 3.73E-11        |
| CDK6        | -11.52      | 1.13E-05        |
| CDKN1A      | -6.62       | 0.0303          |
| CDKN1B      | -12.75      | 4.10E-05        |
| DEK         | -36.39      | 8.33E-06        |
| DDX39A      | -23.05      | 2.26E-05        |
| CCNB1       | -2.61       | 0.0006          |
| SGOL1       | -4.41       | 3.39E-05        |
| RRM2        | -7.16       | 0.0001          |
| TOP2A       | -4.91       | 0.0003          |
| H2AFZ       | -9.15       | 1.49E-05        |
| HAT1        | -310.55     | 1.33E-09        |
| CAPZA1      | -137.54     | 6.40E-10        |
| HADHB       | -51         | 1.03E-08        |
| IDH3A       | -68.9       | 2.83E-09        |
| KPNA2       | -24.31      | 2.65E-07        |
| PGK1        | -221.21     | 6.74E-08        |

**Supplementary table S3: Upregulated melanoma markers analyzed by microarray in patient-derived Lin-neg vs. healthy donor PBMCs population**

| Gene Symbol | Fold Change | <i>P</i> -value |
|-------------|-------------|-----------------|
| DEC1        | 2.75        | 9.14E-06        |
| B4GALNT1    | 2.74        | 0.0001          |
| BAGE;       |             |                 |
| BAGE4;      |             |                 |
| BAGE3;      |             |                 |
| BAGE2;      |             |                 |
| BAGE5       | 3.24        | 4.28E-06        |
| MAGEA1      | 4.06        | 4.25E-05        |
| DCD         | 2.61        | 0.0045          |
| S100A3      | 2.78        | 0.0005          |
| S100A7L2    | 2.99        | 0.0093          |
| S100P       | 6.67        | 0.0006          |

**Supplementary table S4: Gene primers sequence used in this study**

| Gene       | Forward Primer 5'-3'     | Reverse Primer 5'-3'    |
|------------|--------------------------|-------------------------|
| USP7       | GACCGATCCTGAGAAAGGATTTAT | CGTAGCCTGTGTGCTTCTT     |
| PTEN       | TGGATTCGACTTAGACTTGACCT  | GGTGGGTTATGGTCTTCAAAGG  |
| Tenascin-C | CGAGAAAGGCAGACACAAGA     | GATGGAGACTGTATAAGGCGTAG |
| RGS22      | TGGATCACAGTGGAATGAAGAG   | CAAGAGGGTTGCCATTTGTG    |
| GPCPD1     | GAGTTCAAGTGCAGGCATTC     | GAGACAAGCTGTACCCACAT    |

***\*Please note: Supplementary table S5 containing genomic mutational analysis of Lin-neg/CTC enriched population derived from CDX models (S5a and S5b) are provided in supplementary excel files.***

**Supplementary table S6: Tables showing top five significantly altered canonical pathways in Lin-neg cell population by Ingenuity pathway analyses.**

|           | Ingenuity Canonical Pathways                      | -log(p-value) | Ratio | z-score | # of Molecules |
|-----------|---------------------------------------------------|---------------|-------|---------|----------------|
| Activated | RhoGDI Signaling                                  | 5.62E-03      | 0.393 | 5.939   | 7              |
|           | PTEN Signaling                                    | 5.87E-06      | 0.496 | 4.276   | 14             |
|           | PPAR Signaling                                    | 1.44E-02      | 0.411 | 4.003   | 7              |
|           | Role of p14/p19ARF in Tumor Suppression           | 1.11E-03      | 0.535 | 3.838   | 2              |
|           | PPAR $\alpha$ /RXR $\alpha$ Activation            | 5.51E-05      | 0.439 | 3.3     | 22             |
| Inhibited | Role of NFAT in Regulation of the Immune Response | 1.67E-15      | 0.581 | -9.077  | 90             |
|           | IL-8 Signaling                                    | 3.37E-05      | 0.437 | -9.055  | 87             |
|           | Phospholipase C Signaling                         | 1.78E-08      | 0.471 | -9.037  | 94             |
|           | NF- $\kappa$ B Signaling                          | 1.40E-09      | 0.514 | -8.91   | 99             |
|           | Integrin Signaling                                | 3.43E-09      | 0.489 | -8.889  | 9              |

**Supplementary table S7: Tables showing cellular functions in Lin-neg cell population by Ingenuity pathway analyses.**

|           | Functions Annotation           | p-Value  | Activation z-score | # of Molecules |
|-----------|--------------------------------|----------|--------------------|----------------|
| Activated | organismal death               | 4.15E-26 | 32.077             | 1343           |
|           | morbidity or mortality         | 2.21E-26 | 31.785             | 1360           |
|           | Growth Failure                 | 2.2E-10  | 17.474             | 334            |
|           | hypoplasia of lymphatic system | 1.38E-13 | 10.023             | 105            |
|           | hypoplasia of lymphoid organ   | 4.32E-13 | 9.83               | 101            |
| Inhibited | infection by RNA virus         | 4.9E-46  | -19.961            | 620            |
|           | infection by Retroviridae      | 2.02E-40 | -19.699            | 503            |
|           | HIV infection                  | 2.21E-40 | -19.675            | 499            |
|           | infection of cells             | 1.64E-52 | -19.587            | 562            |
|           | infection by lentivirus        | 1.07E-40 | -19.568            | 501            |

**Supplementary table S8: Specific mutations in BMRTCs (HLA+/MeIA+ cell population of xenografts)**

| Chrom | Position  | Ref  | Variant | Allele Call  | Gene ID |
|-------|-----------|------|---------|--------------|---------|
| chr18 | 48575100  | C    | G       | Homozygous   | SMAD4   |
| chr18 | 48575118  | T    | A       | Homozygous   | SMAD4   |
| chr18 | 48575124  | A    | G       | Homozygous   | SMAD4   |
| chr18 | 48575136  | A    | G       | Homozygous   | SMAD4   |
| chr18 | 48575178  | T    | C       | Homozygous   | SMAD4   |
| chr18 | 48575205  | C    | T       | Homozygous   | SMAD4   |
| chr18 | 48575208  | A    | G       | Homozygous   | SMAD4   |
| chr18 | 48575211  | A    | G       | Homozygous   | SMAD4   |
| chr5  | 112175578 | A    | G       | Homozygous   | APC     |
| chr5  | 112175599 | T    | C       | Homozygous   | APC     |
| chr5  | 112175605 | A    | C       | Heterozygous | APC     |
| chr5  | 112175608 | T    | C       | Heterozygous | APC     |
| chr5  | 112175614 | A    | T       | Heterozygous | APC     |
| chr5  | 112175755 | A    | G       | Homozygous   | APC     |
| chr5  | 112175761 | TTTT | CTTC    | Homozygous   | APC     |
| chr5  | 112175992 | A    | T       | Homozygous   | APC     |
| chr5  | 112176014 | C    | T       | Homozygous   | APC     |
| chr5  | 112176034 | T    | A       | Heterozygous | APC     |

**Supplementary table S9: Top five upstream regulators and their functional annotation in BMRTC vs CTCs populations derived from melanoma patient-derived CDXs models (Patients #1-8)**

|           | Upstream Regulator   | Molecule Type                     | Activation z-score | p-value  | # of Molecules | Diseases or Functions Annotation | p-Value  | Activation z-score | # Molecules |
|-----------|----------------------|-----------------------------------|--------------------|----------|----------------|----------------------------------|----------|--------------------|-------------|
| Activated | NFE2L2               | transcription regulator           | 5.617              | 0.0175   | 34             | Viral Infection                  | 2.08E-14 | 11.435             | 217         |
|           | ESR1                 | ligand-dependent nuclear receptor | 5.258              | 0.000149 | 105            | infection by RNA virus           | 4.35E-15 | 10.698             | 142         |
|           | 1,2-dithiol-3-thione | chemical reagent                  | 5.073              | 0.000137 | 26             | infection of cells               | 1.7E-17  | 10.448             | 133         |
|           | TGFB1                | growth factor                     | 4.727              | 0.00729  | 123            | infection by HIV-1               | 3.87E-14 | 9.979              | 103         |
|           | XBP1                 | transcription regulator           | 4.621              | 0.00025  | 25             | HIV infection                    | 3.82E-11 | 9.794              | 109         |
| Inhibited | CD 437               | chemical drug                     | -5.667             | 1.38E-09 | 36             | organismal death                 | 4.52E-12 | -14.901            | 293         |
|           | ST1926               | chemical drug                     | -5.468             | 9.05E-09 | 30             | morbidity or mortality           | 7.74E-12 | -14.827            | 295         |
|           | miR-16-5p            | mature microRNA                   | -5.33              | 5.47E-06 | 29             | Growth Failure                   | 8.09E-05 | -8.334             | 74          |
|           | RICTOR               | other                             | -5.145             | 7.33E-06 | 34             | death of embryo                  | 5.5E-10  | -5.699             | 33          |
|           | CD3                  | complex                           | -4.972             | 0.00133  | 55             | anemia                           | 4.52E-05 | -4.917             | 54          |
